# Supplementary material for: Energy transfer chemiluminescence for ratiometric pH imaging
Source: Royal Society of Chemistry journal article supplement (doi:10.1039/c8ob00972d), 2018-01-01

## Supporting Information:

# Energy Transfer Chemiluminescence for Ratiometric pH imaging

Weiwei An,<sup>a</sup> Ralph P. Mason<sup>b</sup> and Alexander R. Lippert<sup>\*c,d</sup>

---

<sup>a</sup> Department of Chemistry, Southern Methodist University, Dallas, TX 75275-0314, E-mail: alippert@smu.edu

<sup>b</sup> Prognostic Imaging Research Laboratory (PIRL), Pre-clinical Imaging Section, Department of Radiology, UT Southwestern Medical Center, Dallas, TX 75390-9058

<sup>c</sup> Center for Drug Discovery, Design, and Delivery (CD4), Southern Methodist University, Dallas, TX 75275-0314

<sup>d</sup> Center for Global Health Impact (CGHI), Southern Methodist University, Dallas, TX 75275-0314

# <sup>1</sup>H and <sup>13</sup>C NMR Spectra

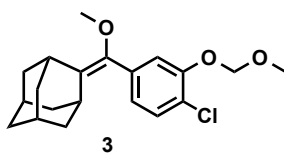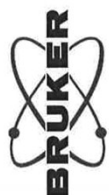

Current Data Parameters  
 NAME aww-mom ether-pure  
 EXPNO 1  
 PROCNO 1  
 F2 - Acquisition Parameters  
 Date\_ 20160908  
 Time\_ 11.47  
 INSTRUM spect  
 PROBHD 5 mm BBO BB-1H  
 PULPROG zg30  
 TD 65536  
 SOLVENT CDCl3  
 NS 8  
 DS 2  
 SWH 5597.015 Hz  
 FIDRES 0.085404 Hz  
 AQ 5.8545494 sec  
 RG 30.62  
 DW 89.333 usec  
 DE 0 K  
 TE 6.50 usec  
 D1 1.00000000 sec  
 TDO 1  
 ===== CHANNEL f1 =====  
 SF01 400.1320010 MHz  
 NUC1 1H  
 P1 11.25 usec  
 PLW1 10.0000000 W  
 F2 - Processing Parameters  
 SI 65536  
 SF 400.1300000 MHz  
 WDW EM  
 SSB 0  
 LB 0.30 Hz  
 GB 0  
 PC 1.00

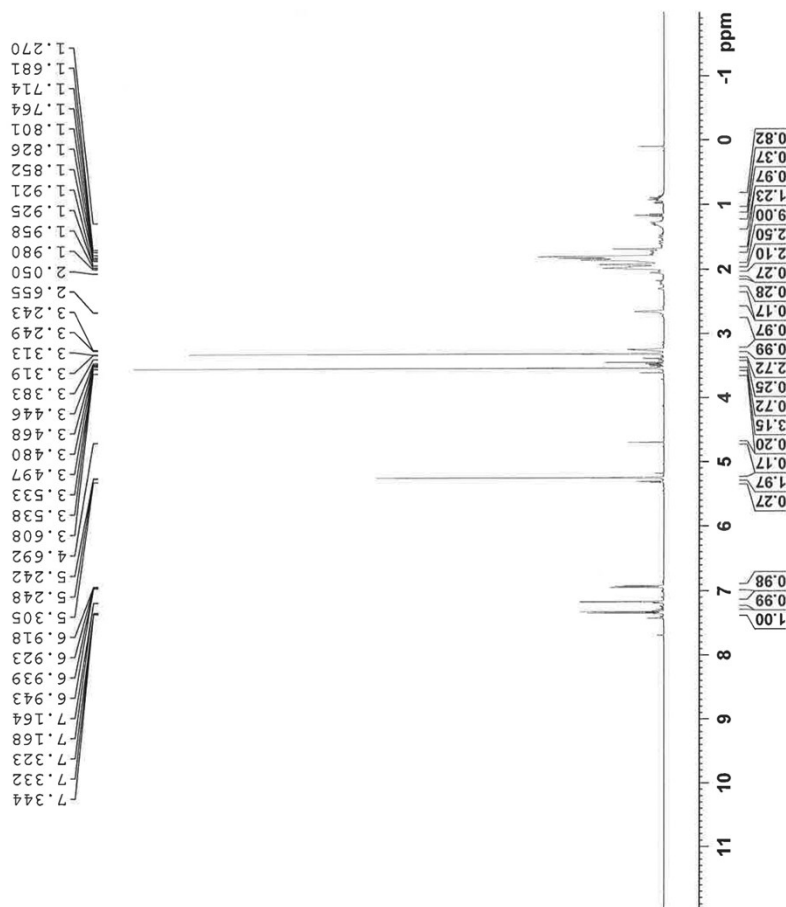

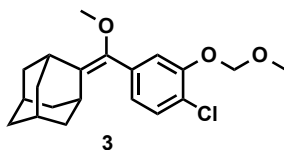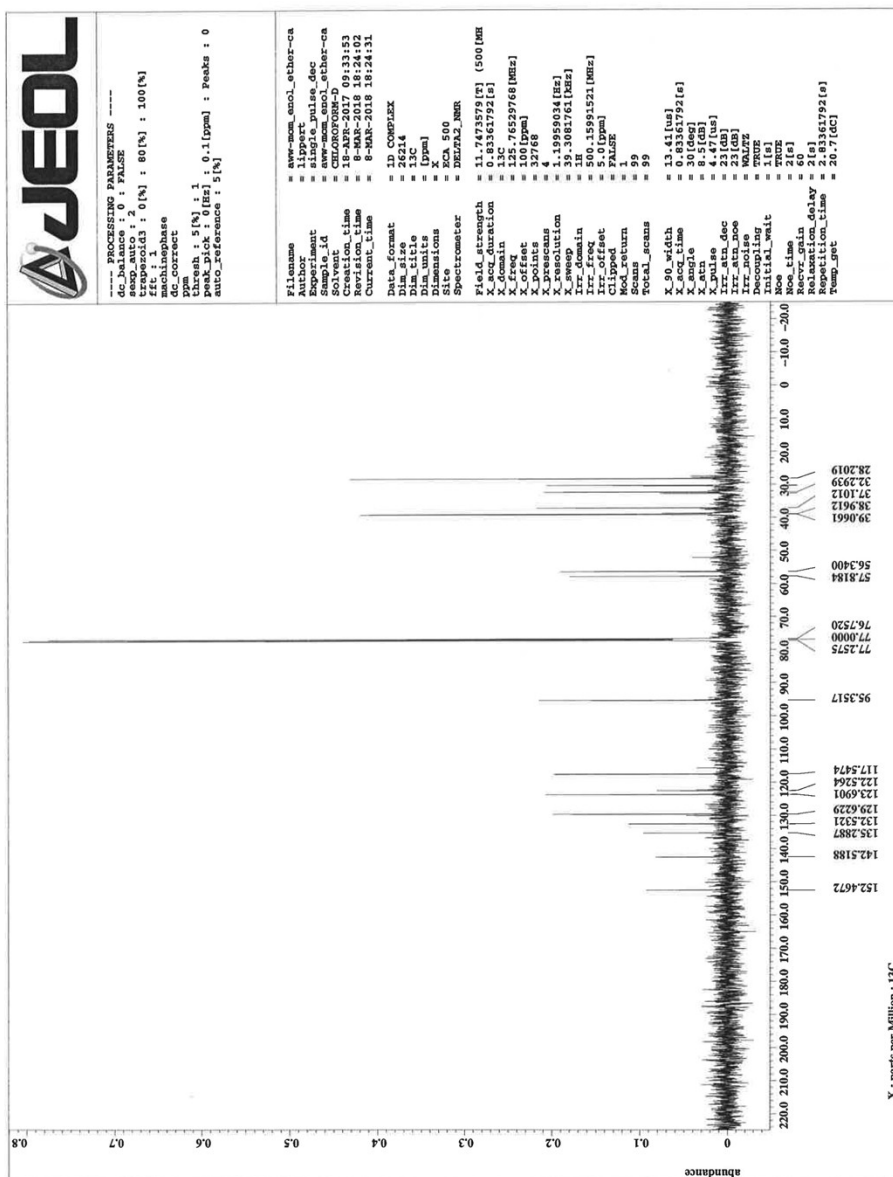

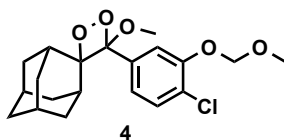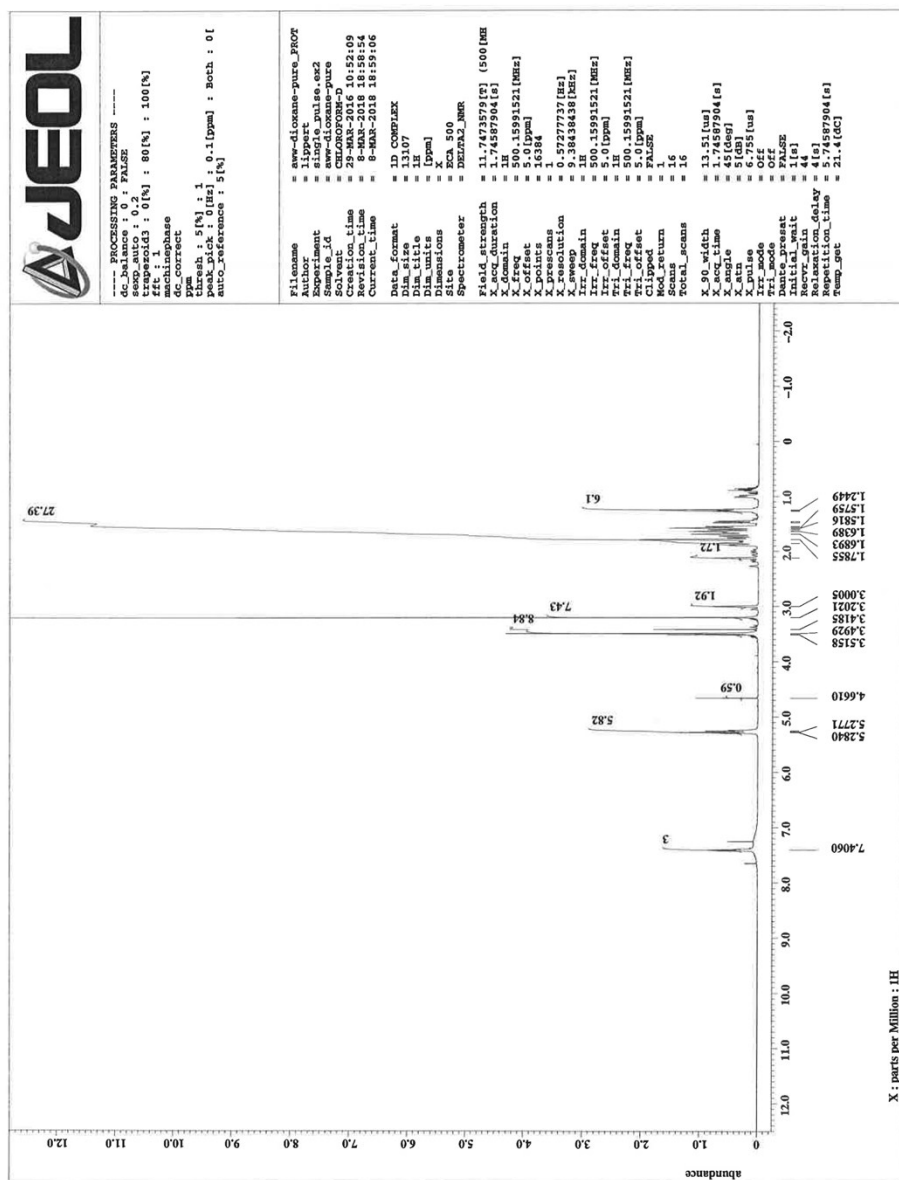

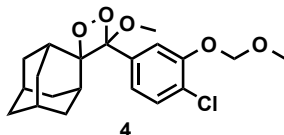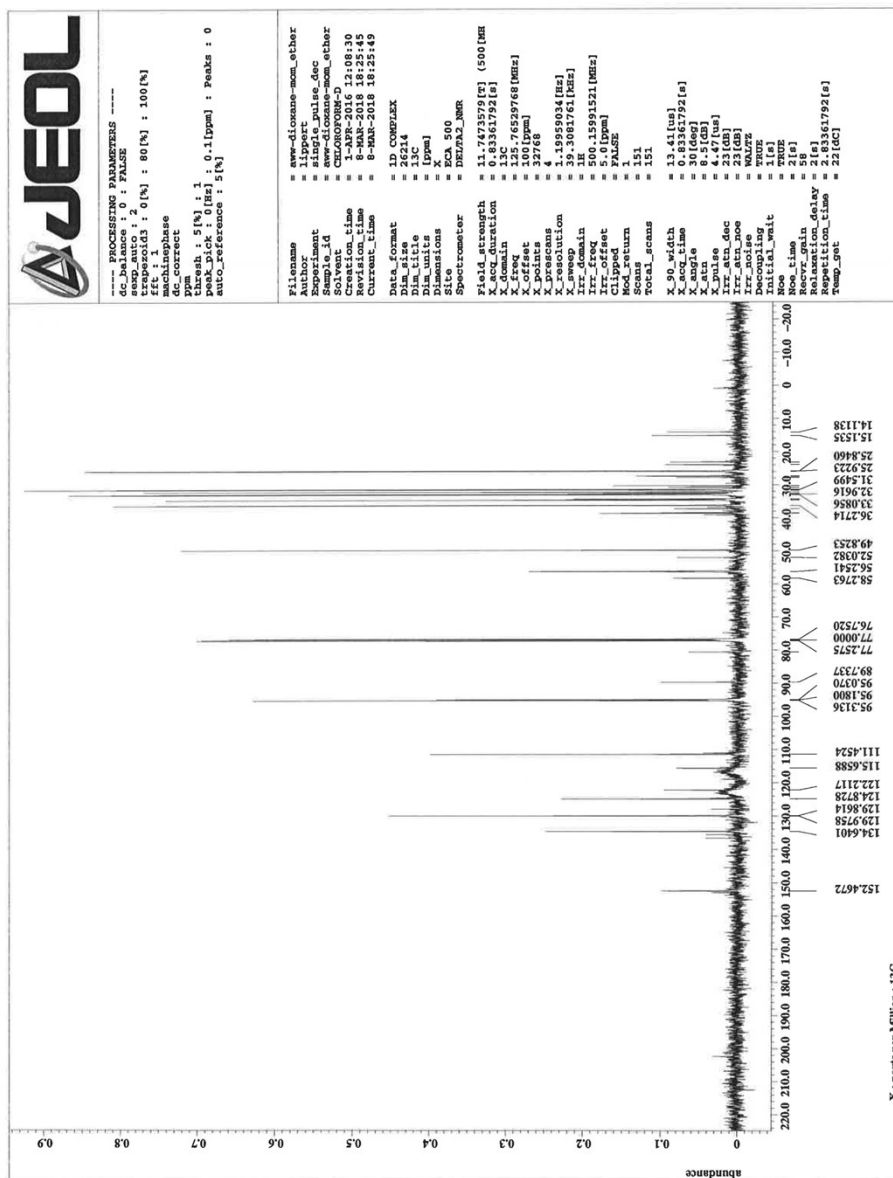

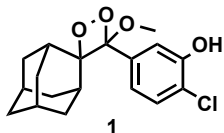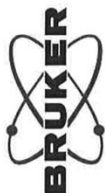

Current Data Parameters  
 Name aww-phenol-ac-probe  
 EXPNO 1  
 PROCNO 1

F2 - Acquisition Parameters  
 Date\_ 20160405  
 Time 17.53

INSTRUM spect  
 PROBD 5 mm BBO BB-1H  
 PULPROG zgpg30  
 TD 65536  
 SOLVENT CDCl3  
 NS 8  
 DS 2  
 SWH 5597.015 Hz  
 FIDRES 0.085404 Hz  
 AQ 5.8545494 sec  
 RG 327.6  
 DW 89.333 usec  
 DE 6.50 usec  
 TE 0 K  
 D1 1.00000000 sec  
 D11 1  
 TD0

===== CHANNEL f1 =====  
 SFO1 400.1320000 MHz  
 NUC1 1H  
 P1 11.25 usec  
 PLW1 10.00000000 W

F2 - Processing parameters  
 SI 65536  
 SF 400.1300000 MHz  
 DM EX  
 SSB 0  
 LB 0.30 Hz  
 GB 0  
 PC 1.00

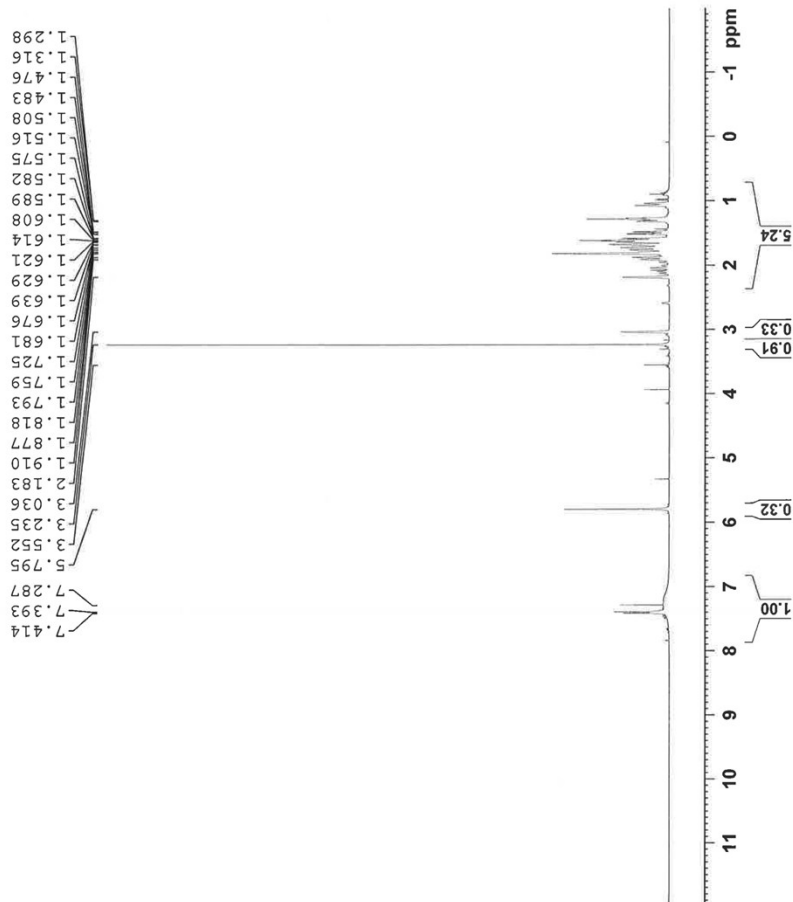

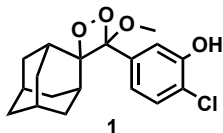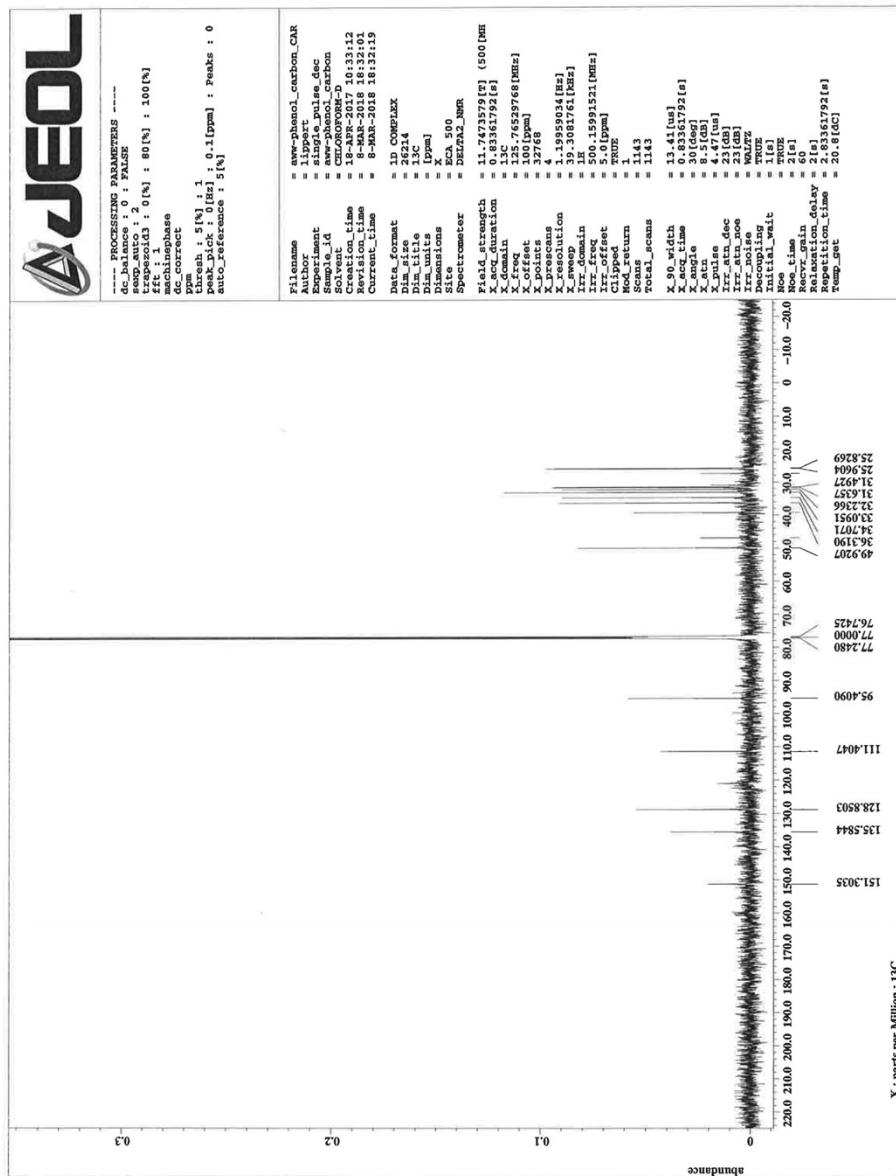

Supplement: c8ob00972d1.pdf [file c8ob00972d1.pdf]
